# Supplementary material for: Has the reporting quality of published randomised controlled trial protocols improved since the SPIRIT statement? A methodological study
Source: PubMed Central journal article supplement — BMJ Open. 2020 Aug 26;10(8):e038283. doi: 10.1136/bmjopen-2020-038283 (PMC7451949; doi:10.1136/bmjopen-2020-038283), 2020-08-26
Supplement: bmjopen-2020-038283supp001.pdf [file bmjopen-2020-038283supp001.pdf]

**Appendix A**

## Search strategy

('protocol'/exp OR (protocol):ti) AND ('randomized controlled trial'/exp OR 'randomized controlled trial (topic)'/de OR ((random\* NEAR/3 trial\*)):ab,ti) AND [2008-2012]/py

('protocol'/exp OR (protocol):ti) AND ('randomized controlled trial'/exp OR 'randomized controlled trial (topic)'/de OR ((random\* NEAR/3 trial\*)):ab,ti) AND [2014-2019]/py

## Appendix B

## Inter-rater agreement of checklist items from the SPIRIT statement

| Section/Item                                              | No. | Checklist Items                                                                                                                                                                                       | Kappa Score | Agreement (%) |
|-----------------------------------------------------------|-----|-------------------------------------------------------------------------------------------------------------------------------------------------------------------------------------------------------|-------------|---------------|
| <b>Administrative information</b>                         |     |                                                                                                                                                                                                       |             |               |
| <b>Title</b>                                              | 1   | Descriptive title identifying the study design, population, interventions, and, if applicable, trial acronym                                                                                          | 0.49        | 92.3          |
| <b>Trial registration</b>                                 | 2a  | Trial identifier and registry name. If not yet registered, name of intended registry                                                                                                                  | 1           | 100           |
|                                                           | 2b  | All items from the World Health Organization (WHO) Trial Registration Data Set                                                                                                                        | 0.01        | 75.3          |
| <b>Protocol version</b>                                   | 3   | Date and version identifier                                                                                                                                                                           | 0.61        | 83.9          |
| <b>Funding</b>                                            | 4a  | Funding Sources: Sources of financial, material, and other support                                                                                                                                    | 0.39        | 91.4          |
|                                                           | 4b  | Funding Types: Sources of financial, material, and other support                                                                                                                                      | 0.15        | 70.7          |
| <b>Roles and responsibility</b>                           | 5a  | Names, affiliations, and roles of protocol contributors                                                                                                                                               | 0.58        | 95.7          |
|                                                           | 5b  | Name and contact information for the trial sponsor                                                                                                                                                    | 0.19        | 78.3          |
|                                                           | 5c  | Role of study sponsor and funders                                                                                                                                                                     | 0.67        | 83.7          |
|                                                           | 5d  | Composition, roles, and responsibilities of the coordinating center, steering committee, end point adjudication committee, data management team, and other individuals or groups overseeing the trial | 0.35        | 72            |
| <b>Introduction</b>                                       |     |                                                                                                                                                                                                       |             |               |
| <b>Background and rationale</b>                           | 6a  | Description of research question and justification for undertaking the trial, including summary of relevant studies examining benefits and harms for each intervention                                | 1           | 100           |
|                                                           | 6b  | Explanation for choice of comparators                                                                                                                                                                 | 1           | 100           |
| <b>Objectives</b>                                         | 7   | Specific objectives or hypotheses                                                                                                                                                                     | 0.24        | 73.1          |
| <b>Trial design</b>                                       | 8   | Description of trial design, including type of trial, allocation ratio, and framework                                                                                                                 | 0.27        | 67.7          |
| <b>Methods: Participants, interventions, and outcomes</b> |     |                                                                                                                                                                                                       |             |               |
| <b>Study setting</b>                                      | 9   | Description of study settings and list of countries where data will be collected. Reference to where list of study sites can be obtained                                                              | 0.29        | 67            |
| <b>Eligibility criteria</b>                               | 10  | Inclusion and exclusion criteria for participants. If applicable, eligibility criteria for study centers and individuals who will perform the interventions                                           | 0.35        | 90.3          |
| <b>Interventions</b>                                      | 11a | Interventions for each group with sufficient detail to allow replication, including how and when they will be administered.                                                                           | 0.07        | 87.1          |
|                                                           | 11b | Criteria for discontinuing or modifying allocated interventions for a given trial participant                                                                                                         | 0.33        | 69.9          |
|                                                           | 11c | Strategies to improve adherence to intervention protocols, and any procedures for monitoring adherence                                                                                                | 0.50        | 76.3          |
|                                                           | 11d | Relevant concomitant care and interventions that are permitted or prohibited during the trial                                                                                                         | 0.54        | 85            |
| <b>Outcomes</b>                                           | 12a | Primary, secondary, and other outcomes, including the specific measurement variable                                                                                                                   | 0.15        | 79.6          |

|                                                            |     |                                                                                                                                                                                                                                                                                                                    |       |      |
|------------------------------------------------------------|-----|--------------------------------------------------------------------------------------------------------------------------------------------------------------------------------------------------------------------------------------------------------------------------------------------------------------------|-------|------|
|                                                            |     | pressure), analysis metric, method of aggregation, and time point for each outcome.                                                                                                                                                                                                                                |       |      |
|                                                            | 12b | Explanation of the clinical relevance of chosen efficacy and harm outcomes                                                                                                                                                                                                                                         | 0.12  | 66.7 |
| <b>Participant timeline</b>                                | 13  | Time schedule of enrolment, interventions, assessments, and visits for participants                                                                                                                                                                                                                                | 0.46  | 80.7 |
| <b>Sample size</b>                                         | 14  | Estimated number of participants needed to achieve study objectives and how it was determined, including clinical and statistical assumptions supporting any sample size calculations                                                                                                                              | 0.49  | 97.8 |
| <b>Recruitment</b>                                         | 15  | Strategies for achieving adequate participant enrolment to reach target sample size                                                                                                                                                                                                                                | 0.47  | 75.3 |
| <b>Assignment of interventions (for controlled trials)</b> |     |                                                                                                                                                                                                                                                                                                                    |       |      |
| <b>Allocation Sequence generation</b>                      | 16a | Method of generating the allocation sequence, and list of any factors for stratification. To reduce predictability of a random sequence, details of any planned restriction should be provided in a separate document that is unavailable to those who enrol participants or assign interventions.                 | 0.50  | 83.9 |
| <b>Allocation concealment mechanism</b>                    | 16b | Mechanism of implementing the allocation sequence, describing any steps to conceal the sequence until interventions are assigned                                                                                                                                                                                   | 0.44  | 72.8 |
| <b>Implementation</b>                                      | 16c | Who will generate the allocation sequence, who will enrol participants, and who will assign participants to interventions                                                                                                                                                                                          | 0.38  | 71   |
| <b>Blinding (masking)</b>                                  | 17a | Who will be blinded after assignment to interventions, and how                                                                                                                                                                                                                                                     | 0.24  | 71.6 |
|                                                            | 17b | If blinded, circumstances under which unblinding is permissible, and procedure for revealing a participant's allocated intervention during the trial                                                                                                                                                               | 0.73  | 93.8 |
| <b>Data collection, management, and analysis</b>           |     |                                                                                                                                                                                                                                                                                                                    |       |      |
| <b>Data collection methods</b>                             | 18a | Plans for assessment and collection of outcome, baseline, and other trial data, including any related processes to promote data quality and a description of study instruments along with their reliability and validity, if known. Reference to where data collection forms can be found, if not in the protocol. | 0.25  | 68.8 |
|                                                            | 18b | Plans to promote participant retention and complete follow-up, including list of any outcome data to be collected for participants who discontinue or deviate from intervention protocols                                                                                                                          | 0.46  | 74.2 |
| <b>Data management</b>                                     | 19  | Plans for data entry, coding, security, and storage, including any related processes to promote data quality.                                                                                                                                                                                                      | 0.67  | 83.9 |
| <b>Statistical methods</b>                                 | 20a | Statistical methods for analyzing primary and secondary outcomes. Reference to where other details of the statistical analysis plan can be found, if not in the protocol.                                                                                                                                          | -0.03 | 91.4 |
|                                                            | 20b | Methods for any additional analyses                                                                                                                                                                                                                                                                                | 0.61  | 80.7 |
|                                                            | 20c | Definition of analysis population relating to protocol nonadherence, and any statistical methods to handle missing data                                                                                                                                                                                            | 0.25  | 64.5 |
| <b>Monitoring</b>                                          |     |                                                                                                                                                                                                                                                                                                                    |       |      |
| <b>Data monitoring</b>                                     | 21a | Composition of DMC; summary of its role and reporting structure; statement of whether it is independent from the sponsor and competing interests; and reference to where further details                                                                                                                           | 0.60  | 81.7 |

|                                      |     |                                                                                                                                                                                                |       |      |
|--------------------------------------|-----|------------------------------------------------------------------------------------------------------------------------------------------------------------------------------------------------|-------|------|
|                                      |     | about its charter can be found, if not in the protocol. Alternatively, an explanation of why a DMC is not needed.                                                                              |       |      |
|                                      | 21b | Description of any interim analyses and stopping guidelines, including who will have access to these interim results and make the final decision to terminate the trial                        | 0.76  | 90.3 |
| <b>Harms</b>                         | 22  | Plans for collecting, assessing, reporting, and managing solicited and spontaneously reported adverse events and other unintended effects of trial interventions or trial conduct              | 0.67  | 83.9 |
| <b>Auditing</b>                      | 23  | Frequency and procedures for auditing trial conduct, if any, and whether the process will be independent from investigators and the sponsor                                                    | 0.35  | 83.9 |
| <b>Ethics and dissemination</b>      |     |                                                                                                                                                                                                |       |      |
| <b>Research ethics approval</b>      | 24  | Plans for seeking REC/IRB approval                                                                                                                                                             | -0.06 | 87.1 |
| <b>Protocol amendments</b>           | 25  | Plans for communicating important protocol modifications to relevant parties                                                                                                                   | 0.70  | 89.3 |
| <b>Consent or assent</b>             | 26a | Who will obtain informed consent or assent from potential trial participants or authorized surrogates, and how                                                                                 | 0.68  | 83.9 |
|                                      | 26b | Additional consent provisions for collection and use of participant data and biological specimens in ancillary studies, if applicable                                                          | 0.25  | 92.2 |
| <b>Confidentiality</b>               | 27  | How personal information about potential and enrolled participants will be collected, shared, and maintained in order to protect confidentiality before, during, and after the trial           | 0.70  | 85   |
| <b>Declaration of interests</b>      | 28  | Financial and other competing interests for principal investigators for the overall trial and each study site                                                                                  | 0.13  | 83.9 |
| <b>Access to data</b>                | 29  | Statement of who will have access to the final trial data set, and disclosure of contractual agreements that limit such access for investigators                                               | 0.65  | 83.9 |
| <b>Ancillary and post-trial care</b> | 30  | Provisions, if any, for ancillary and post-trial care, and for compensation to those who suffer harm from trial participation                                                                  | 0.31  | 83.9 |
| <b>Dissemination policy</b>          | 31a | Plans for investigators and sponsor to communicate trial results to participants, health care professionals, the public, and other relevant groups, including any publication restrictions     | 0.65  | 82.8 |
|                                      | 31b | Authorship eligibility guidelines and any intended use of professional writers                                                                                                                 | 0.29  | 88.2 |
|                                      | 31c | Plans, if any, for granting public access to the full protocol, participant-level data set, and statistical code                                                                               | 0.55  | 81.7 |
| <b>Appendices</b>                    |     |                                                                                                                                                                                                |       |      |
| <b>Informed consent materials</b>    | 32  | Model consent form and other related documentation given to participants and authorized surrogates                                                                                             | 0.66  | 98.9 |
| <b>Biological specimens</b>          | 33  | Plans for collection, laboratory evaluation, and storage of biological specimens for genetic or molecular analysis in the current trial and for future use in ancillary studies, if applicable | 0.62  | 80   |

## Appendix C

## Checklist items from the SPIRIT statement by mean completeness in RCT protocols

| Section/Item                                              | Item Number | Checklist Items                                                                                                                                                                                       | Before SPIRIT N=150 | After SPIRIT N=150 |
|-----------------------------------------------------------|-------------|-------------------------------------------------------------------------------------------------------------------------------------------------------------------------------------------------------|---------------------|--------------------|
| <b>Administrative information</b>                         |             |                                                                                                                                                                                                       |                     |                    |
| Title                                                     | 1           | Descriptive title identifying the study design, population, interventions, and, if applicable, trial acronym                                                                                          | 126 (84%)           | 134 (89%)          |
| Trial registration                                        | 2a          | Trial identifier and registry name. If not yet registered, name of intended registry                                                                                                                  | 147 (98%)           | 149 (99%)          |
|                                                           | 2b          | All items from the World Health Organization (WHO) Trial Registration Data Set                                                                                                                        | 133 (89%)           | 135 (90%)          |
| Protocol version                                          | 3           | Date and version identifier                                                                                                                                                                           | 14 (9%)             | 42 (28%)           |
| Funding                                                   | 4a          | Funding Sources: Sources of financial, material, and other support                                                                                                                                    | 131 (88%)           | 145 (97%)          |
|                                                           | 4b          | Funding Types: Sources of financial, material, and other support                                                                                                                                      | 111 (75%)           | 108 (73%)          |
| Roles and responsibility                                  | 5a          | Names, affiliations, and roles of protocol contributors                                                                                                                                               | 145 (97%)           | 134 (89%)          |
|                                                           | 5b          | Name and contact information for the trial sponsor                                                                                                                                                    | 17 (11%)            | 19 (13%)           |
|                                                           | 5c          | Role of study sponsor and funders                                                                                                                                                                     | 23 (15%)            | 69 (47%)           |
|                                                           | 5d          | Composition, roles, and responsibilities of the coordinating center, steering committee, end point adjudication committee, data management team, and other individuals or groups overseeing the trial | 21 (14%)            | 39 (26%)           |
| <b>Introduction</b>                                       |             |                                                                                                                                                                                                       |                     |                    |
| Background and rationale                                  | 6a          | Description of research question and justification for undertaking the trial, including summary of relevant studies examining benefits and harms for each intervention                                | 150 (100%)          | 150 (100%)         |
|                                                           | 6b          | Explanation for choice of comparators                                                                                                                                                                 | 150 (100%)          | 149 (99%)          |
| Objectives                                                | 7           | Specific objectives or hypotheses                                                                                                                                                                     | 100 (67%)           | 104 (69%)          |
| Trial design                                              | 8           | Description of trial design, including type of trial, allocation ratio, and framework                                                                                                                 | 92 (61%)            | 105 (70%)          |
| <b>Methods: Participants, interventions, and outcomes</b> |             |                                                                                                                                                                                                       |                     |                    |
| Study setting                                             | 9           | Description of study settings and list of countries where data will be collected. Reference to where list of study sites can be obtained                                                              | 80 (55%)            | 84 (56%)           |
| Eligibility criteria                                      | 10          | Inclusion and exclusion criteria for participants. If applicable, eligibility criteria for study centers and individuals who will perform the interventions                                           | 143 (95%)           | 135 (90%)          |

|                                                            |     |                                                                                                                                                                                                                                                                                                    |           |           |
|------------------------------------------------------------|-----|----------------------------------------------------------------------------------------------------------------------------------------------------------------------------------------------------------------------------------------------------------------------------------------------------|-----------|-----------|
| Interventions                                              | 11a | Interventions for each group with sufficient detail to allow replication, including how and when they will be administered.                                                                                                                                                                        | 148 (99%) | 141 (94%) |
|                                                            | 11b | Criteria for discontinuing or modifying allocated interventions for a given trial participant                                                                                                                                                                                                      | 30 (20%)  | 54 (36%)  |
|                                                            | 11c | Strategies to improve adherence to intervention protocols, and any procedures for monitoring adherence                                                                                                                                                                                             | 52 (35%)  | 54 (36%)  |
|                                                            | 11d | Relevant concomitant care and interventions that are permitted or prohibited during the trial                                                                                                                                                                                                      | 23 (15%)  | 28 (19%)  |
| Outcomes                                                   | 12a | Primary, secondary, and other outcomes, including the specific measurement variable (pressure), analysis metric, method of aggregation, and time point for each outcome.                                                                                                                           | 146 (97%) | 143 (95%) |
|                                                            | 12b | Explanation of the clinical relevance of chosen efficacy and harm outcomes                                                                                                                                                                                                                         | 129 (86%) | 103 (69%) |
| Participant timeline                                       | 13  | Time schedule of enrolment, interventions, assessments, and visits for participants                                                                                                                                                                                                                | 50 (33%)  | 114 (76%) |
| Sample size                                                | 14  | Estimated number of participants needed to achieve study objectives and how it was determined, including clinical and statistical assumptions supporting any sample size calculations                                                                                                              | 138 (92%) | 137 (92%) |
| Recruitment                                                | 15  | Strategies for achieving adequate participant enrolment to reach target sample size                                                                                                                                                                                                                | 42 (28%)  | 50 (33%)  |
| <b>Assignment of interventions (for controlled trials)</b> |     |                                                                                                                                                                                                                                                                                                    |           |           |
| Allocation Sequence generation                             | 16a | Method of generating the allocation sequence, and list of any factors for stratification. To reduce predictability of a random sequence, details of any planned restriction should be provided in a separate document that is unavailable to those who enrol participants or assign interventions. | 127 (85%) | 124 (83%) |
| Allocation concealment mechanism                           | 16b | Mechanism of implementing the allocation sequence, describing any steps to conceal the sequence until interventions are assigned                                                                                                                                                                   | 85 (57%)  | 90 (60%)  |
| Implementation                                             | 16c | Who will generate the allocation sequence, who will enrol participants, and who will assign participants to interventions                                                                                                                                                                          | 37 (25%)  | 58 (39%)  |
| Blinding (masking)                                         | 17a | Who will be blinded after assignment to interventions, and how                                                                                                                                                                                                                                     | 94 (71%)  | 102 (76%) |
|                                                            | 17b | If blinded, circumstances under which unblinding is permissible, and procedure for revealing a                                                                                                                                                                                                     | 10 (8%)   | 20 (15%)  |

|                                                  |     | participant's allocated intervention during the trial                                                                                                                                                                                                                                                              |            |           |
|--------------------------------------------------|-----|--------------------------------------------------------------------------------------------------------------------------------------------------------------------------------------------------------------------------------------------------------------------------------------------------------------------|------------|-----------|
| <b>Data collection, management, and analysis</b> |     |                                                                                                                                                                                                                                                                                                                    |            |           |
| Data collection methods                          | 18a | Plans for assessment and collection of outcome, baseline, and other trial data, including any related processes to promote data quality and a description of study instruments along with their reliability and validity, if known. Reference to where data collection forms can be found, if not in the protocol. | 117 (78%)  | 88 (59%)  |
|                                                  | 18b | Plans to promote participant retention and complete follow-up, including list of any outcome data to be collected for participants who discontinue or deviate from intervention protocols                                                                                                                          | 25 (17%)   | 56 (37%)  |
| Data management                                  | 19  | Plans for data entry, coding, security, and storage, including any related processes to promote data quality.                                                                                                                                                                                                      | 61 (41%)   | 108 (72%) |
| Statistical methods                              | 20a | Statistical methods for analyzing primary and secondary outcomes. Reference to where other details of the statistical analysis plan can be found, if not in the protocol.                                                                                                                                          | 150 (100%) | 144 (96%) |
|                                                  | 20b | Methods for any additional analyses                                                                                                                                                                                                                                                                                | 38 (25%)   | 55 (37%)  |
|                                                  | 20c | Definition of analysis population relating to protocol nonadherence, and any statistical methods to handle missing data                                                                                                                                                                                            | 110 (73%)  | 95 (63%)  |
| <b>Monitoring</b>                                |     |                                                                                                                                                                                                                                                                                                                    |            |           |
| Data monitoring                                  | 21a | Composition of DMC; summary of its role and reporting structure; statement of whether it is independent from the sponsor and competing interests; and reference to where further details about its charter can be found, if not in the protocol. Alternatively, an explanation of why a DMC is not needed.         | 25 (17%)   | 53 (36%)  |
|                                                  | 21b | Description of any interim analyses and stopping guidelines, including who will have access to these interim results and make the final decision to terminate the trial                                                                                                                                            | 28 (19%)   | 41 (27%)  |
| Harms                                            | 22  | Plans for collecting, assessing, reporting, and managing solicited and spontaneously reported adverse events and other unintended effects of trial interventions or trial conduct                                                                                                                                  | 70 (47%)   | 99 (66%)  |
| Auditing                                         | 23  | Frequency and procedures for auditing trial conduct, if any, and whether the process will be                                                                                                                                                                                                                       | 14 (9%)    | 21 (14%)  |

|                                 |     | independent from investigators and the sponsor                                                                                                                                                 |           |           |
|---------------------------------|-----|------------------------------------------------------------------------------------------------------------------------------------------------------------------------------------------------|-----------|-----------|
| <b>Ethics and dissemination</b> |     |                                                                                                                                                                                                |           |           |
| Research ethics approval        | 24  | Plans for seeking REC/IRB approval                                                                                                                                                             | 145 (97%) | 145 (97%) |
| Protocol amendments             | 25  | Plans for communicating important protocol modifications to relevant parties                                                                                                                   | 3 (2%)    | 44 (29%)  |
| Consent or assent               | 26a | Who will obtain informed consent or assent from potential trial participants or authorized surrogates, and how                                                                                 | 46 (31%)  | 81 (54%)  |
|                                 | 26b | Additional consent provisions for collection and use of participant data and biological specimens in ancillary studies, if applicable                                                          | 3 (2%)    | 10 (7%)   |
| Confidentiality                 | 27  | How personal information about potential and enrolled participants will be collected, shared, and maintained in order to protect confidentiality before, during, and after the trial           | 41 (27%)  | 93 (62%)  |
| Declaration of interests        | 28  | Financial and other competing interests for principal investigators for the overall trial and each study site                                                                                  | 147 (98%) | 135 (90%) |
| Access to data                  | 29  | Statement of who will have access to the final trial data set, and disclosure of contractual agreements that limit such access for investigators                                               | 7 (5%)    | 54 (36%)  |
| Ancillary and post-trial care   | 30  | Provisions, if any, for ancillary and post-trial care, and for compensation to those who suffer harm from trial participation                                                                  | 14 (9%)   | 20 (13%)  |
| Dissemination policy            | 31a | Plans for investigators and sponsor to communicate trial results to participants, health care professionals, the public, and other relevant groups, including any publication restrictions     | 23 (15%)  | 88 (59%)  |
|                                 | 31b | Authorship eligibility guidelines and any intended use of professional writers                                                                                                                 | 2 (1%)    | 10 (7%)   |
|                                 | 31c | Plans, if any, for granting public access to the full protocol, participant-level data set, and statistical code                                                                               | 5 (3%)    | 59 (39%)  |
| <b>Appendices</b>               |     |                                                                                                                                                                                                |           |           |
| Informed consent materials      | 32  | Model consent form and other related documentation given to participants and authorized surrogates                                                                                             | 0 (0%)    | 6 (4%)    |
| Biological specimens            | 33  | Plans for collection, laboratory evaluation, and storage of biological specimens for genetic or molecular analysis in the current trial and for future use in ancillary studies, if applicable | 6 (29%)   | 8 (35%)   |
